# Supplementary material for: A MATLAB tool for pathway enrichment using a topology-based pathway regulation score
Source: PubMed Central journal article supplement (PMC4255424; doi:10.1186/s12859-014-0358-2), 2014-11-04
Supplement: 12859_2014_358_MOESM2_ESM.pdf [file 12859_2014_358_MOESM2_ESM.pdf]

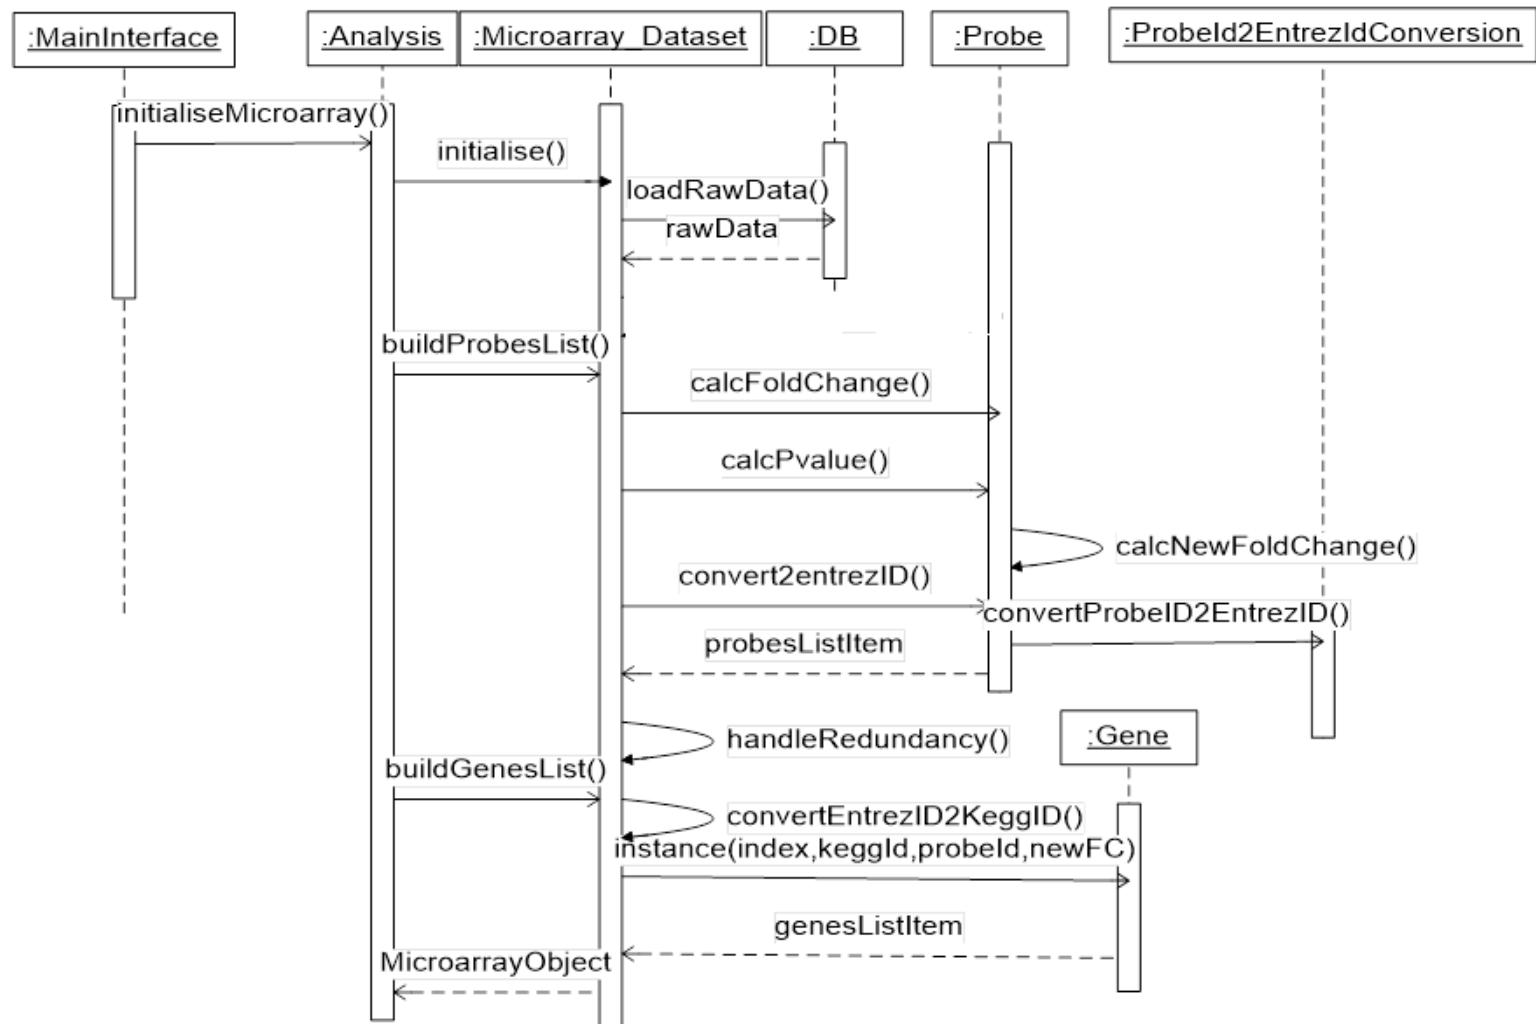

UML sequence diagram representing the implementation of the “initialise” microarray function.
